# Supplementary material for: Probiotic Potentiality from Versatile Lactiplantibacillus plantarum Strains as Resource to Enhance Freshwater Fish Health
Source: MDPI journal article supplement (doi:10.3390/microorganisms10020463), 2022-02-17
Supplement: s1 [file s1]

**Table S1** Resistance to pH 2.5 at 15°C and 30°C of the examined *Lp. plantarum* strains (23V, 33V, 36V, 37V, 64V, 65V, 66V, 67V, 68V, 73V). The data (mean  $\pm$  SD; n=3) were expressed as log CFU/mL. Different lowercase letters (a–h) in each row indicate significant differences ( $p < 0.05$ ).

**Table S2** Resistance to 0.3% bile salts at 15°C and 30°C of the examined *Lp. plantarum* strains (23V, 33V, 36V, 37V, 64V, 65V, 66V, 67V, 68V, 73V). The data (mean  $\pm$  SD; n=3) were expressed as log CFU/mL. Different lowercase letters (a–e) in each row indicate significant differences ( $p < 0.05$ ).

**Table S3** Adhesion to toluene and xylene of *Lp. plantarum* strains (23V, 33V, 36V, 37V, 64V, 65V, 66V, 67V, 68V, 73V) after different contact times. The data (mean  $\pm$  SD; n=3) were expressed as percentage of hydrophobicity

**Table S4** Auto-aggregation (AA) at 15°C and 30°C of the *Lp. plantarum* strains (23V, 33V, 36V, 37V, 64V, 65V, 66V, 67V, 68V, 73V). The data (mean  $\pm$  SD; n=3) were expressed as percentage of AA
