# Supplementary material for: Probiotic Potentiality from Versatile Lactiplantibacillus plantarum Strains as Resource to Enhance Freshwater Fish Health
Source: MDPI journal article supplement (doi:10.3390/microorganisms10020463), 2022-02-17
Supplement: s1 [file s1]

**Table S3** Adhesion to toluene and xylene of *Lp. plantarum* strains (23V, 33V, 36V, 37V, 64V, 65V, 66V, 67V, 68V, 73V) after different contact times. The data (mean  $\pm$  SD; n=3) were expressed as percentage of hydrophobicity

| Hydrophobicity (%) Toluene 15 °C |                |                |                |                |                |                |                |                |                |                |
|----------------------------------|----------------|----------------|----------------|----------------|----------------|----------------|----------------|----------------|----------------|----------------|
| Time (min)                       | 23V            | 33V            | 36V            | 37V            | 64V            | 65V            | 66V            | 67V            | 68V            | 73V            |
| 15                               | 41.5 $\pm$ 2.3 | 84.3 $\pm$ 3.5 | 31.5 $\pm$ 2.4 | 17.3 $\pm$ 1.7 | 14.1 $\pm$ 2.2 | 11.9 $\pm$ 1.8 | 9.73 $\pm$ 0.8 | 66.9 $\pm$ 3.0 | 4.8 $\pm$ 1.0  | 3.5 $\pm$ 0.5  |
| 30                               | 49.2 $\pm$ 1.8 | 89.6 $\pm$ 1.4 | 40.8 $\pm$ 2.8 | 17.3 $\pm$ 1.1 | 14.5 $\pm$ 1.4 | 11.7 $\pm$ 1.9 | 10.2 $\pm$ 0.6 | 71.8 $\pm$ 3.7 | 16.5 $\pm$ 1.4 | 9.0 $\pm$ 0.4  |
| 60                               | 54.0 $\pm$ 1.9 | 91.4 $\pm$ 1.3 | 41.4 $\pm$ 1.5 | 26.8 $\pm$ 1.9 | 15.8 $\pm$ 1.0 | 12.4 $\pm$ 0.4 | 10.5 $\pm$ 0.8 | 94.4 $\pm$ 2.3 | 18.5 $\pm$ 0.8 | 25.4 $\pm$ 2.8 |
| Hydrophobicity (%) Xylene 15 °C  |                |                |                |                |                |                |                |                |                |                |
| Time (min)                       | 23V            | 33V            | 36V            | 37V            | 64V            | 65V            | 66V            | 67V            | 68V            | 73V            |
| 15                               | 26.8 $\pm$ 2.0 | 91.3 $\pm$ 1.3 | 37.7 $\pm$ 2.4 | 29.6 $\pm$ 2.0 | 8.6 $\pm$ 0.6  | 6.23 $\pm$ 0.7 | 6.6 $\pm$ 0.6  | 81.4 $\pm$ 3.7 | 16.1 $\pm$ 2.3 | 11.5 $\pm$ 0.6 |
| 30                               | 30.3 $\pm$ 3.0 | 92.3 $\pm$ 2.3 | 40.5 $\pm$ 2.9 | 29.9 $\pm$ 0.8 | 10.8 $\pm$ 0.6 | 10.5 $\pm$ 1.4 | 6.6 $\pm$ 0.4  | 90.6 $\pm$ 2.6 | 17.8 $\pm$ 0.7 | 17.5 $\pm$ 3.5 |
| 60                               | 30.8 $\pm$ 3.2 | 92.4 $\pm$ 4.0 | 42.0 $\pm$ 1.4 | 34.9 $\pm$ 3.8 | 15.1 $\pm$ 2.0 | 13.1 $\pm$ 1.0 | 12.7 $\pm$ 2.2 | 96.1 $\pm$ 1.5 | 20.3 $\pm$ 1.2 | 27.1 $\pm$ 2.0 |
| Hydrophobicity (%) Toluene 30 °C |                |                |                |                |                |                |                |                |                |                |
| Time (min)                       | 23V            | 33V            | 36V            | 37V            | 64V            | 65V            | 66V            | 67V            | 68V            | 73V            |
| 15                               | 61.1 $\pm$ 2.2 | 91.8 $\pm$ 3.3 | 42.3 $\pm$ 1.8 | 24.7 $\pm$ 1.7 | 4.6 $\pm$ 0.4  | 1.6 $\pm$ 0.3  | 1.4 $\pm$ 0.4  | 83.8 $\pm$ 3.0 | 0 $\pm$ 0      | 31.3 $\pm$ 4.0 |
| 30                               | 66.8 $\pm$ 2.7 | 93.6 $\pm$ 1.3 | 47.3 $\pm$ 1.4 | 30.3 $\pm$ 2.8 | 7.3 $\pm$ 1.2  | 9.2 $\pm$ 0.2  | 2.2 $\pm$ 0.2  | 84.6 $\pm$ 2.8 | 1.8 $\pm$ 0.2  | 31.7 $\pm$ 1.1 |
| 60                               | 67.5 $\pm$ 1.4 | 95.6 $\pm$ 0.9 | 49.5 $\pm$ 5.1 | 37.0 $\pm$ 1.1 | 11.9 $\pm$ 0.7 | 12.3 $\pm$ 0.6 | 4.6 $\pm$ 0.3  | 94.9 $\pm$ 5.0 | 8.4 $\pm$ 0.9  | 32.7 $\pm$ 1.6 |
| Hydrophobicity (%) Xylene 30 °C  |                |                |                |                |                |                |                |                |                |                |
| Time (min)                       | 23V            | 33V            | 36V            | 37V            | 64V            | 65V            | 66V            | 67V            | 68V            | 73V            |
| 15                               | 63.8 $\pm$ 3.9 | 91.3 $\pm$ 4.1 | 37.6 $\pm$ 0.5 | 11.0 $\pm$ 0.7 | 3.7 $\pm$ 0.2  | 6.4 $\pm$ 0.4  | 12.8 $\pm$ 1.6 | 86.2 $\pm$ 5.4 | 1.5 $\pm$ 0.1  | 18.8 $\pm$ 1.0 |
| 30                               | 66.5 $\pm$ 1.5 | 93.5 $\pm$ 1.0 | 42.2 $\pm$ 0.8 | 21.0 $\pm$ 0.2 | 5.3 $\pm$ 0.1  | 8.2 $\pm$ 0.5  | 19.2 $\pm$ 1.5 | 93.2 $\pm$ 3.1 | 1.8 $\pm$ 0.2  | 25.3 $\pm$ 2.4 |
| 60                               | 66.9 $\pm$ 2.9 | 95.4 $\pm$ 2.5 | 48.1 $\pm$ 1.1 | 26.6 $\pm$ 1.4 | 8.6 $\pm$ 1.0  | 9.0 $\pm$ 0.9  | 24.5 $\pm$ 3.6 | 95.6 $\pm$ 1.3 | 2.3 $\pm$ 0.5  | 30.9 $\pm$ 1.9 |
