# Supplementary material for: Probiotic Potentiality from Versatile Lactiplantibacillus plantarum Strains as Resource to Enhance Freshwater Fish Health
Source: MDPI journal article supplement (doi:10.3390/microorganisms10020463), 2022-02-17
Supplement: s1 [file s1]

**Table S4** Auto-aggregation (AA) at 15°C and 30°C of the *Lp. plantarum* strains (23V, 33V, 36V, 37V, 64V, 65V, 66V, 67V, 68V, 73V). The data (mean ± SD; n=3) were expressed as percentage of AA.

| Temperature (°C) | Time (h) | Auto-aggregation % |          |          |          |          |          |          |          |          |          |
|------------------|----------|--------------------|----------|----------|----------|----------|----------|----------|----------|----------|----------|
|                  |          | 23V                | 33V      | 36V      | 37V      | 64V      | 65V      | 66V      | 67V      | 68V      | 73V      |
| 15               | 1        | 0.1±0.3            | 0.9±0.1  | 1.2±0.3  | 0.9±0.2  | 1.0±0.5  | 1.5±0.4  | 2.8±1.8  | 0.1±0.1  | 0.3±0.1  | 17.6±1.1 |
|                  | 2        | 0.3±1.8            | 2.1±0.4  | 1.2±0.2  | 2.3±0.2  | 1.2±0.4  | 2.1±0.1  | 5.1±1.2  | 3.1±0.4  | 3.4±1.8  | 17.6±0.9 |
|                  | 5        | 5.0±1.3            | 8.2±1.0  | 4.3±1.0  | 5.5±1.1  | 6.6±1.9  | 11.0±1.1 | 8.4±1.8  | 6.6±1.0  | 4.4±0.9  | 23.5±1.0 |
|                  | 24       | 34.9±2.1           | 30.2±1.4 | 33.3±1.8 | 31.0±1.4 | 20.7±2.0 | 33.5±1.5 | 35.8±1.7 | 40.6±1.8 | 49.3±1.5 | 44.5±1.6 |
| 30               | 1        | 6.2±0.5            | 5.9±2.0  | 5.8±1.8  | 5.9±1.0  | 4.7±1.6  | 6.4±2.1  | 3.9±0.6  | 4.9±1.9  | 4.8±0.7  | 7.0±0.7  |
|                  | 2        | 9.7±1.9            | 10.4±1.3 | 11.2±1.0 | 9.4±1.4  | 7.5±1.0  | 8.5±1.2  | 6.8±1.2  | 9.4±1.2  | 7.2±2.1  | 11.6±1.4 |
|                  | 5        | 22.0±1.1           | 23.3±1.0 | 22.3±1.4 | 19.0±1.7 | 17.2±1.3 | 18.6±1.8 | 16.1±1.4 | 19.7±1.6 | 17.0±1.1 | 20.3±1.3 |
|                  | 24       | 49.4±1.8           | 57.0±0.9 | 51.9±1.2 | 43.7±1.6 | 39.2±1.1 | 43.4±1.7 | 36.4±2.0 | 47.0±1.5 | 39.8±2.2 | 49.1±0.5 |
