# Supplementary material for: Probiotic Potentiality from Versatile Lactiplantibacillus plantarum Strains as Resource to Enhance Freshwater Fish Health
Source: MDPI journal article supplement (doi:10.3390/microorganisms10020463), 2022-02-17
Supplement: s1 [file s1]

**Table S1** Resistance to pH 2.5 at 15°C and 30°C of the examined *Lp. plantarum* strains (23V, 33V, 36V, 37V, 64V, 65V, 66V, 67V, 68V, 73V). The data (mean  $\pm$  SD; n=3) were expressed as log CFU/mL. Different lowercase letters (a–h) in each row indicate significant differences ( $p < 0.05$ ).

| Temperature (°C) | Time (h) | <i>Lp. Plantarum</i> strain  |                              |                              |                              |                              |                              |                              |                              |                              |                              |
|------------------|----------|------------------------------|------------------------------|------------------------------|------------------------------|------------------------------|------------------------------|------------------------------|------------------------------|------------------------------|------------------------------|
|                  |          | 23V                          | 33V                          | 36V                          | 37V                          | 64V                          | 65V                          | 66V                          | 67V                          | 68V                          | 73V                          |
| 15               | 0        | 8.43 $\pm$ 0.01 <sup>c</sup> | 8.15 $\pm$ 0.01 <sup>e</sup> | 8.12 $\pm$ 0.01 <sup>f</sup> | 8.27 $\pm$ 0.06 <sup>d</sup> | 8.22 $\pm$ 0.03 <sup>e</sup> | 8.33 $\pm$ 0.04 <sup>d</sup> | 8.71 $\pm$ 0.02 <sup>a</sup> | 8.34 $\pm$ 0.05 <sup>c</sup> | 8.52 $\pm$ 0.03 <sup>b</sup> | 8.60 $\pm$ 0.04 <sup>b</sup> |
|                  | 3        | 7.15 $\pm$ 0.03 <sup>f</sup> | 7.38 $\pm$ 0.01 <sup>d</sup> | 7.41 $\pm$ 0.01 <sup>c</sup> | 6.87 $\pm$ 0.05 <sup>h</sup> | 7.21 $\pm$ 0.04 <sup>e</sup> | 7.49 $\pm$ 0.02 <sup>c</sup> | 7.25 $\pm$ 0.01 <sup>e</sup> | 7.05 $\pm$ 0.05 <sup>g</sup> | 7.64 $\pm$ 0.04 <sup>b</sup> | 7.78 $\pm$ 0.04 <sup>a</sup> |
| 30               | 0        | 8.32 $\pm$ 0.04 <sup>a</sup> | 8.16 $\pm$ 0.02 <sup>b</sup> | 8.22 $\pm$ 0.06 <sup>b</sup> | 8.22 $\pm$ 0.04 <sup>b</sup> | 8.22 $\pm$ 0.02 <sup>b</sup> | 8.29 $\pm$ 0.02 <sup>a</sup> | 8.26 $\pm$ 0.05 <sup>b</sup> | 8.34 $\pm$ 0.03 <sup>a</sup> | 8.40 $\pm$ 0.02 <sup>a</sup> | 8.39 $\pm$ 0.03 <sup>a</sup> |
|                  | 3        | 7.66 $\pm$ 0.03 <sup>b</sup> | 7.83 $\pm$ 0.02 <sup>a</sup> | 7.50 $\pm$ 0.07 <sup>c</sup> | 7.24 $\pm$ 0.03 <sup>d</sup> | 7.39 $\pm$ 0.03 <sup>c</sup> | 7.61 $\pm$ 0.04 <sup>b</sup> | 7.57 $\pm$ 0.04 <sup>b</sup> | 7.32 $\pm$ 0.03 <sup>d</sup> | 7.60 $\pm$ 0.01 <sup>b</sup> | 7.89 $\pm$ 0.06 <sup>a</sup> |
