# Supplementary material for: Probiotic Potentiality from Versatile Lactiplantibacillus plantarum Strains as Resource to Enhance Freshwater Fish Health
Source: MDPI journal article supplement (doi:10.3390/microorganisms10020463), 2022-02-17
Supplement: s1 [file s1]

**Table S2** Resistance to 0.3% bile salts at 15°C and 30°C of the examined *Lp. plantarum* strains (23V, 33V, 36V, 37V, 64V, 65V, 66V, 67V, 68V, 73V). The data (mean ± SD; n=3) were expressed as log CFU/mL. Different lowercase letters (a–e) in each row indicate significant differences ( $p < 0.05$ ).

| Temperature (°C) | Time (h) | <i>Lp. plantarum</i> strains |                        |                        |                        |                        |                        |                        |                        |                        |                        |
|------------------|----------|------------------------------|------------------------|------------------------|------------------------|------------------------|------------------------|------------------------|------------------------|------------------------|------------------------|
|                  |          | 23V                          | 33V                    | 36V                    | 37V                    | 64V                    | 65V                    | 66V                    | 67V                    | 68V                    | 73V                    |
| 15               | 3        | 8.83±0.04 <sup>a</sup>       | 8.85±0.05 <sup>a</sup> | 8.72±0.05 <sup>b</sup> | 8.75±0.04 <sup>b</sup> | 8.71±0.01 <sup>b</sup> | 8.27±0.02 <sup>c</sup> | 8.62±0.01 <sup>c</sup> | 8.80±0.03 <sup>a</sup> | 8.33±0.02 <sup>d</sup> | 8.31±0.03 <sup>c</sup> |
|                  | 24       | 8.71±0.05 <sup>a</sup>       | 8.62±0.03 <sup>a</sup> | 8.55±0.04 <sup>b</sup> | 8.11±0.05 <sup>d</sup> | 8.20±0.01 <sup>d</sup> | 8.25±0.04 <sup>c</sup> | 8.33±0.02 <sup>c</sup> | 8.58±0.03 <sup>b</sup> | 8.12±0.04 <sup>d</sup> | 8.08±0.07 <sup>e</sup> |
| 30               | 3        | 8.84±0.06 <sup>a</sup>       | 8.11±0.03 <sup>c</sup> | 8.79±0.01 <sup>a</sup> | 8.79±0.03 <sup>a</sup> | 8.17±0.02 <sup>c</sup> | 8.15±0.01 <sup>c</sup> | 8.14±0.03 <sup>c</sup> | 8.68±0.01 <sup>b</sup> | 8.14±0.04 <sup>c</sup> | 8.73±0.02 <sup>b</sup> |
|                  | 24       | 8.34±0.06 <sup>b</sup>       | 8.36±0.02 <sup>b</sup> | 8.78±0.01 <sup>a</sup> | 8.32±0.02 <sup>b</sup> | 8.35±0.04 <sup>b</sup> | 8.34±0.04 <sup>b</sup> | 8.10±0.04 <sup>c</sup> | 8.06±0.03 <sup>c</sup> | 8.07±0.03 <sup>c</sup> | 8.36±0.01 <sup>b</sup> |
