# Supplementary material for: Probiotic Potentiality from Versatile Lactiplantibacillus plantarum Strains as Resource to Enhance Freshwater Fish Health
Source: Microorganisms. 2022 Feb 17;10(2):463. doi: 10.3390/microorganisms10020463 (PMC8877946; doi:10.3390/microorganisms10020463)
Supplement: Supplementary file 1 [file microorganisms-10-00463-s001.zip]

Archive with 5 entries (5 files):
- Supplementary material/Caption Supplementary material.pdf
- Supplementary material/S1 pH resistance.pdf
- Supplementary material/S2 bile salt resistance.pdf
- Supplementary material/S3 hydrophobicity.pdf
- Supplementary material/S4 auto-aggregation.pdf
